# Supplementary material
Source: publisher site journal article supplement (https://www.dovepress.com/article/464655)
Supplement: Supplementary file 1 [file get_supplementary_file.php]

Supplementary Table 1. Primer sequences for qRT-PCR.

| Name | Sequence |
| --- | --- |
| mmu-miR-342-5p | F: 5’-ACACTCCAGCTGGGAGGGGTGCTATCTGTGAT-3’  R: 5’-CTCAACTGGTGTCGTGGA-3’ |
| mmu-circ_0008146 | F: 5’-ATATTGTTCAGCCCAGCCCT-3’  R: 5’-TGAACTGAGCGCCAAGGTTA-3’ |
| mmu-β-actin | F: 5’-TGAGCTGCGTTTTACACCCT-3’  R: 5’-GCCTTCACCGTTCCAGTTTT-3’ |
| mmu-U6 | F: 5’-CGCTTCGGCAGCACATATACTA-3’  R: 5’-CGCTTCACGAATTTGCGTGTCA-3’ |
| hsa-miR-150-3p | F: 5’-CCCCTGGTACAGGCCTG-3’  R: 5’-GTGCAGGGTCCGAGGT-3’ |
| hsa-miR-193b-5p | F: 5’-CGGGCCGGGGTTTTGAGGGC-3’  R: 5’-CAGCCACAAAAGAGCACAAT-3’ |
| hsa-miR-320c | F: 5’-ACACTCCAGCTGGGAAAAGCTGGGTTGAGA-3’  R: 5’-ACACTCCAGCTGGGTCGCCCTC-3’ |
| hsa-miR-342-5p | F: 5’-CCCGAGGGGTGCTATCTGT-3’  R: 5’-GTGCAGGGTCCGAGGT-3’ |
| hsa-miR-124-3p | F: 5’-CGCGTAAGGCACGCGGTG-3’  R: 5’-ATCCAGTGCAGGGTCCGAGG-3’ |
| hsa-miR-216a-5p | F: 5’-ACACTCCAGCTGGGAAGGGTAATCTCAGCTGGCAA-3’  R: 5’-CTCAACTGGTGTCGTGGA-3’ |
| hsa-U6 | F: 5’-CTCGCTTCGGCAGCACATATACTA-3’  R: 5’-ACGAATTTGCGTGTCATCCTTGC-3’ |
| hsa-ACSL4 | F: 5’-CGACCTAAGGGAGTGATG-3’  R: 5’-CCTGCAGCCATAGGTAAAGC-3’ |
| hsa-β-actin | F: 5’-AGGATTCCTATGTGGGCGAC-3’  R: 5’-ATAGCACAGCCTGGATAGCAA-3’ |
